# Supplementary material
Source: publisher figshare collection journal article supplement (https://acs.figshare.com/ndownloader/files/3880720)
Supplement: Supplementary file 1 [file 3880720]

## Electronic Supporting Information

### Electronic Structure and Chemical Bonding in the Double Ring Tubular Boron Clusters

Hung Tan Pham,<sup>a</sup> Long Van Duong,<sup>a</sup> Minh Tho Nguyen<sup>b,1</sup>

<sup>a</sup>*Institute for Computational Science and Technology (ICST), Quang Trung Software City, Ho Chi Minh City, Vietnam*

<sup>b</sup>*Department of Chemistry, University of Leuven, B-3001 Leuven, Belgium*

The supporting information file includes:

- Table S1 defining the parameters of a double ring cylinder.
- Figure S1: Geometries of the B<sub>2n</sub> DR's.
- Figure S2: determination of the *k* parameter.
- Figures S3, S4 and S5: Total and partial densities of state maps.

**Table S1.** The hollow cylinder parameters of  $\pi$ -MOs set of DR B<sub>20</sub> , B<sub>24</sub> , B<sub>28</sub> . The radius R and the length L of these structures are determined from their coordinates. The active radius and the length of these hollow cylinder are calculated by  $r_{\pi} = R \cdot \varepsilon_{\pi}$  and  $L_{\pi} = R \cdot L_{\pi}^f$ , respectively.

| B <sub>2n</sub> |                     | B <sub>20</sub> | B <sub>24</sub> | B <sub>28</sub> |
|-----------------|---------------------|-----------------|-----------------|-----------------|
| R (Å)           |                     | 2.601           | 3.122           | 3.602           |
| L (Å)           |                     | 1.510           | 1.467           | 1.524           |
| $\pi$ -MOs      | $\varepsilon_{\pi}$ | 0.863           | 0.762           | 0.696           |
|                 | $L_{\pi}^f$         | 1.415           | 1.151           | 1.068           |
|                 | $r_{\pi}$ (Å)       | <b>2.245</b>    | <b>2.379</b>    | <b>2.507</b>    |
|                 | $L_{\pi}$ (Å)       | <b>3.680</b>    | <b>3.593</b>    | <b>3.847</b>    |

<sup>1</sup> Email: minh.nguyen@chem.kuleuven.be

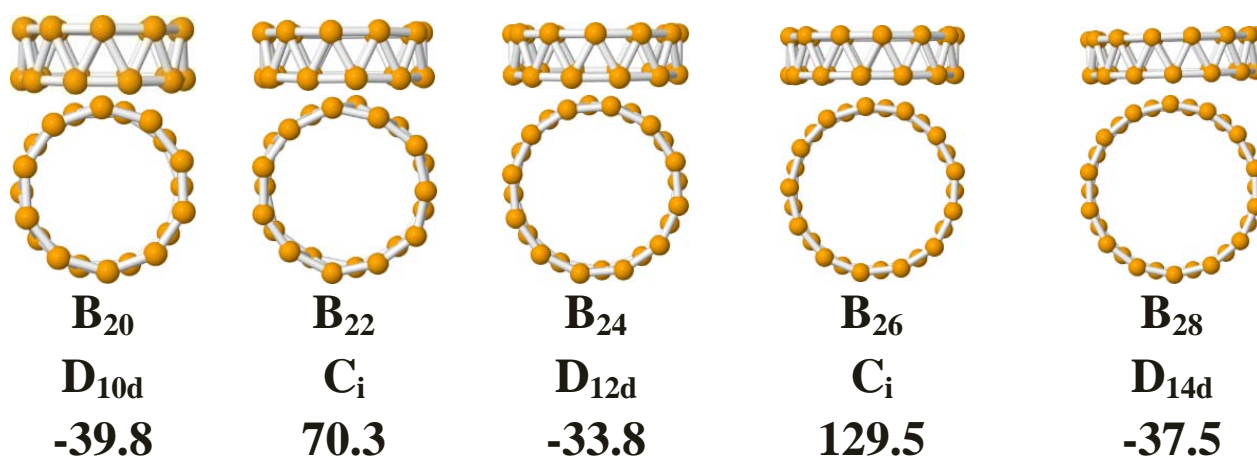

**Figure S1.** The geometries of B<sub>2n</sub> clusters with n = 10,11,12,13,14 DR structures, and their NICS(0.0) values. Geometrical optimizations were performed using TPSSh/6-311+g(d) computations, the NICS(0) values were given by GIAO method at the same level of theory.

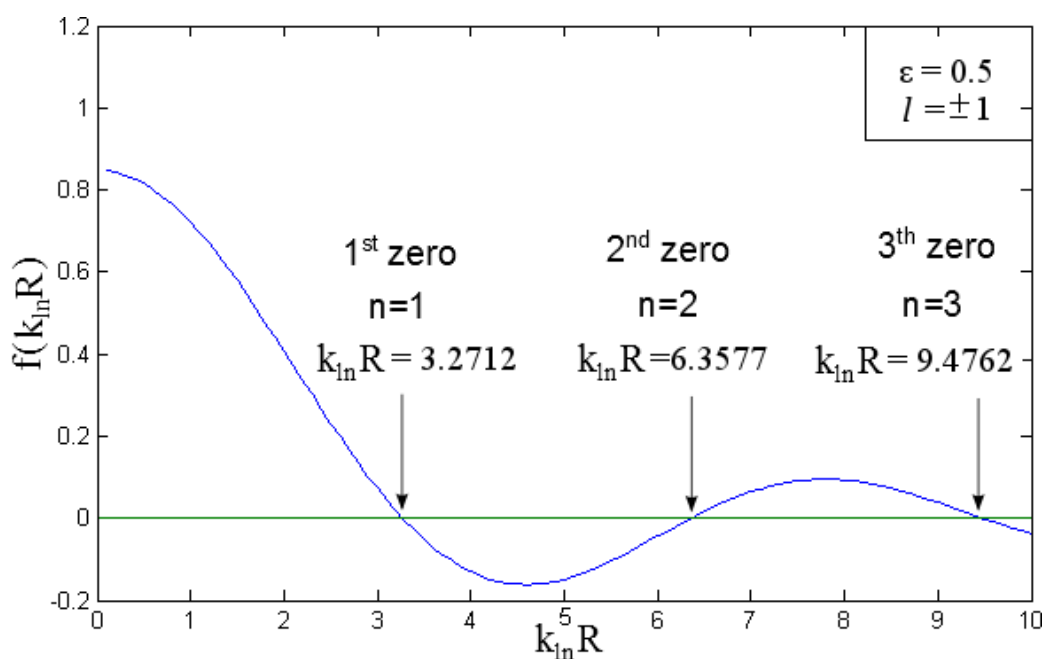

**Figure S2.** Method of determination for  $k_{ln}R$ . Graph shows the first three  $k_{ln}R$  values of Eq.(4) when  $\varepsilon = 0.5$  and  $l = \pm 1$ .

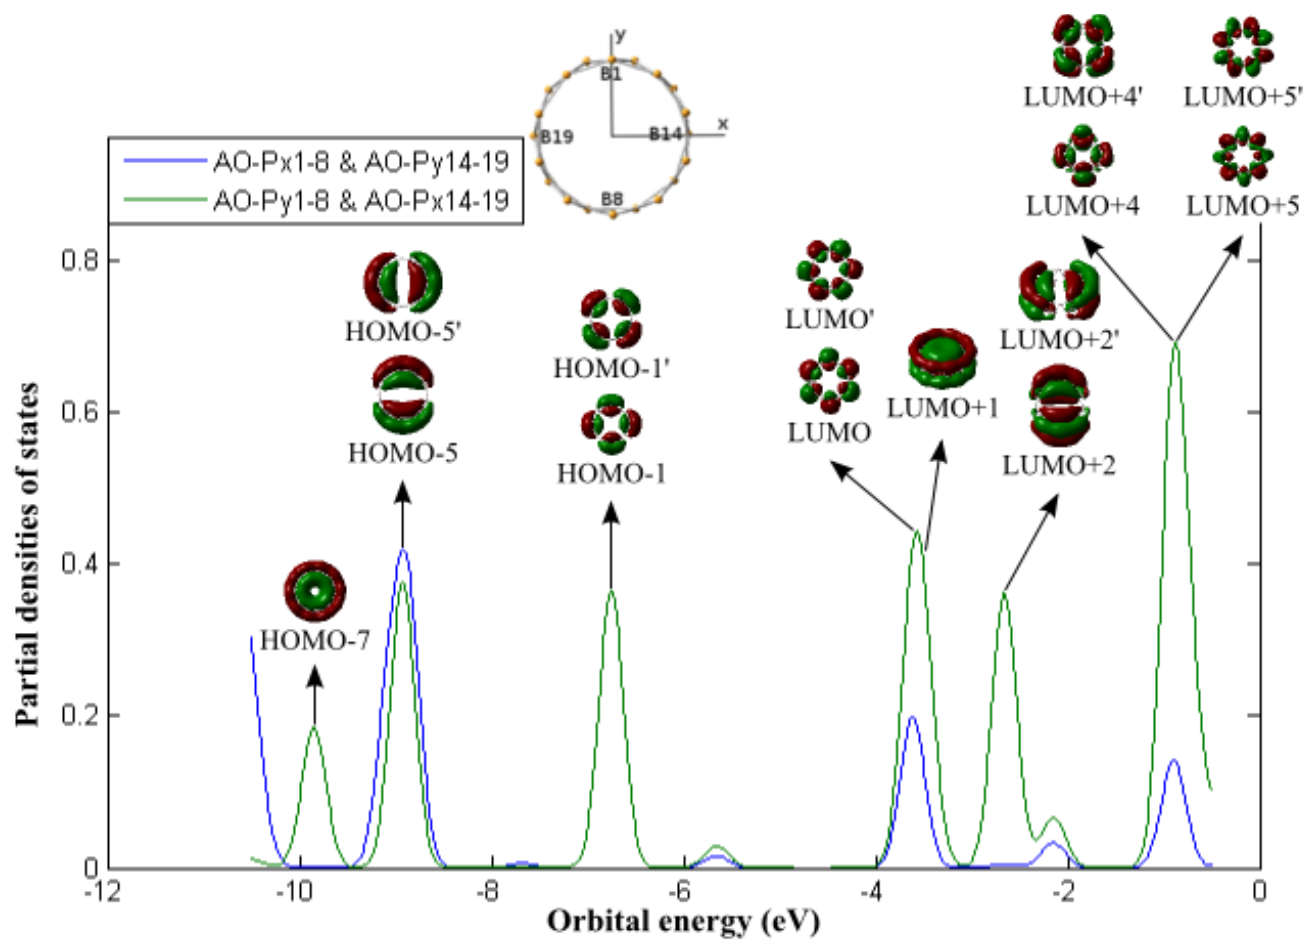

**Figure S3.** Partial (pDOS) densities of state of  $B_{20}$  DR.

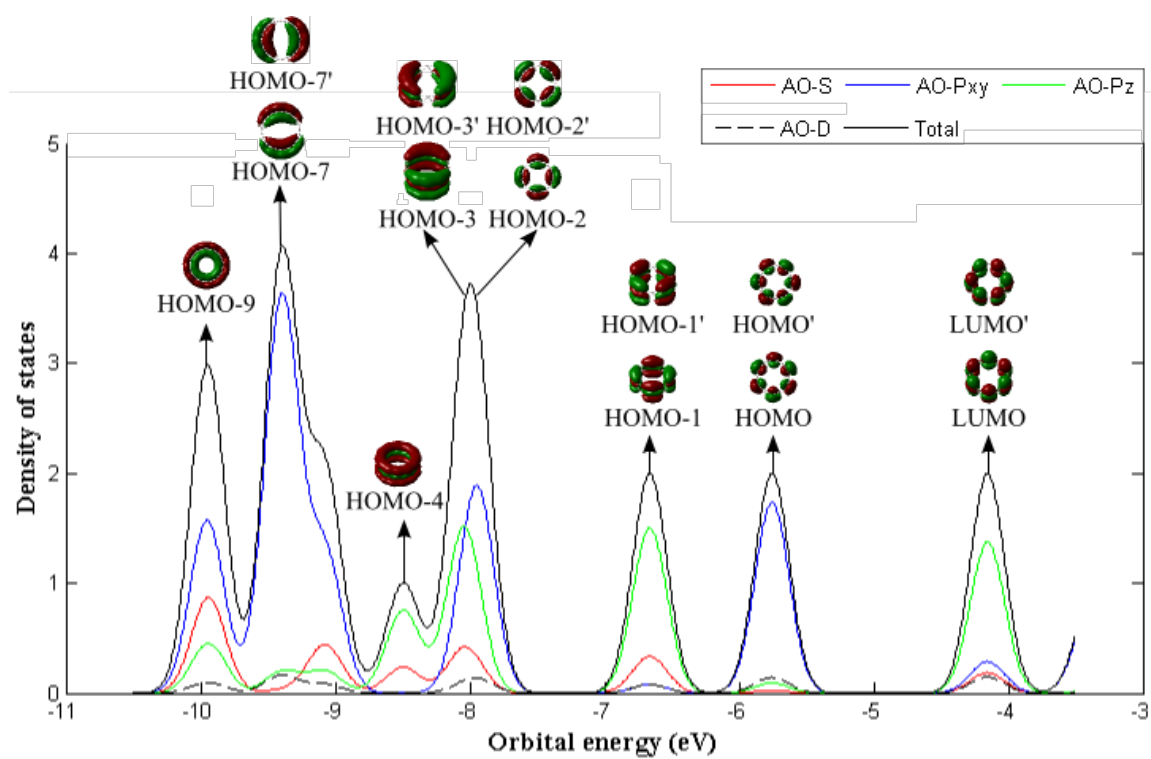

**Figure S4.** Total (DOS) and partial (pDOS) densities of state of B<sub>24</sub> DR.

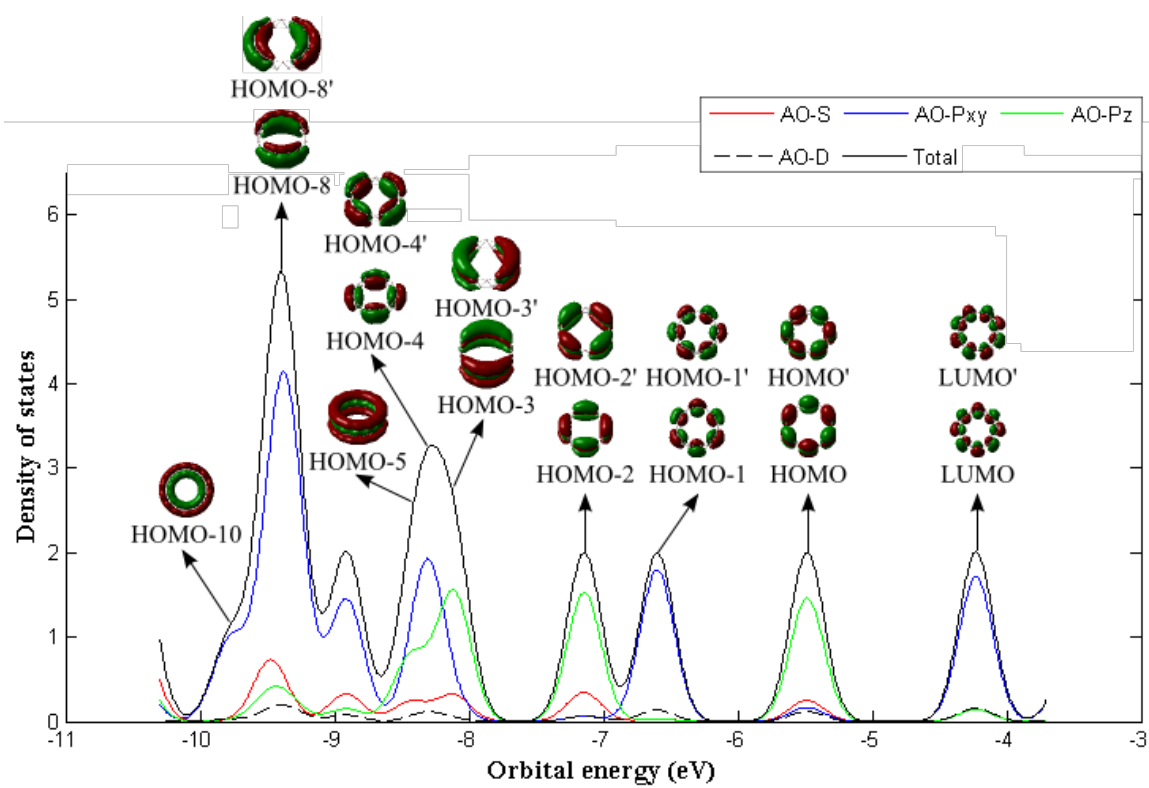

**Figure S5.** Total (DOS) and partial (pDOS) densities of state of B<sub>28</sub> DR.
